# Supplementary material
Source: PubMed Central journal article supplement (PMC3919219)
Supplement: SD1.pdf [file SD1.pdf]

SUPPLEMENTAL MATERIAL

SUPPLEMENTAL TABLE A  
Summary of studies evaluating DBS for HIV and HTLV1

| Disease, assay type, and country                                                | Ref. | Number of samples/filter paper type         | Test                                                                                                               | Sensitivity (%)                        | Specificity (%) | Notes                                                                                                                                                                                                                             |
|---------------------------------------------------------------------------------|------|---------------------------------------------|--------------------------------------------------------------------------------------------------------------------|----------------------------------------|-----------------|-----------------------------------------------------------------------------------------------------------------------------------------------------------------------------------------------------------------------------------|
| <b>HIV</b>                                                                      |      |                                             |                                                                                                                    |                                        |                 |                                                                                                                                                                                                                                   |
| Sierra Leone                                                                    | 1    | 359 patients/<br>Whatman No. 3              | Innotest<br>(Diagnostics<br>Pasteur)                                                                               | 100 (HIV1);<br>87.5 (HIV2)             | 100             | DBS 2.3 times cheaper than<br>venous blood collection. <sup>1</sup><br>Only one HIV-2 sample.                                                                                                                                     |
| India                                                                           | 2    | 89 patients/<br>Whatman 903                 | Micro-ELISA<br>(Vironostika);<br>Western blot<br>(BioRad)                                                          | 100; 92                                | 100; 100        | OD declined after 6 days<br>storage at 36.8°C<br>and 70% humidity.                                                                                                                                                                |
| Zimbabwe                                                                        | 3    | 379 patients/<br>Whatman No. 3              | Gel Particle<br>Agglutination<br>HIV1 and<br>-2 (Serodia);<br>Recombigen HIV1<br>and -2 ELISA<br>(Trinity Biotech) | NR; NR                                 | NR; NR          |                                                                                                                                                                                                                                   |
| The Gambia                                                                      | 4    | 200 patients/Whatman<br>BFC 180             | ICE HIV1.0.2<br>ELISA<br>(Wellcozyme);<br>HIV recombinant<br>(Murex);<br>ICE HIV2<br>ELISA GPA                     | NR                                     | NR              | Pooling of five DBS<br>samples would not<br>lead to any missed positives.                                                                                                                                                         |
| India                                                                           | 5    | 275 patients/<br>Whatman No. 3              | Murex Ag/Ab<br>ELISA<br>(Murex Biotech)                                                                            | 100 (HIV1)                             | 100             | HIV1 and -2. Also tested<br>on 12,617 patients for<br>seroprevalence with<br>overall sensitivity of 99.6%<br>and specificity of 99.9%<br>based on a subset of pooled<br>samples evaluated by PCR<br>(Amplicor HIV 1 v1.5; Roche). |
| Brazil                                                                          | 6    | 457 patients/<br>Whatman 903                | Q-Preven<br>HIV1 + -2<br>(Symbiosis<br>Diagnostika)                                                                | 100                                    | 99.6            | > 4 weeks storage at 37°C and<br>< 50% humidity; OD values<br>started to decrease.                                                                                                                                                |
| Rwanda                                                                          | 7    | 491 patients/<br>Whatman 903                | Uni-Form 2<br>(Abbott);<br>HIV-1.2.0<br>(bioMerieux)                                                               | 100; 99.4                              | 99.1; 99.1      | DBS stored for 14 days;<br>DBS stored for 30 days at<br>ambient temperature.                                                                                                                                                      |
| <b>HIV1 serology (p24)</b>                                                      |      |                                             |                                                                                                                    |                                        |                 |                                                                                                                                                                                                                                   |
| South Africa                                                                    | 8    | 141 patients/<br>Whatman No.1               | Ultrasensitive p24<br>Ag ELISA<br>(Perkin Elmer)                                                                   | 98.8                                   | 100             | Only children included:<br>34 days to 12 years.<br>After 6 weeks of storage,<br>sensitivity dropped to 88.9%.                                                                                                                     |
| Tanzania,<br>Switzerland                                                        | 9    | 282 patients/<br>Whatman No. 3              | HIV p24 Ag<br>(Perkin Elmer)                                                                                       | 84                                     | 100             | Non-subtype D sensitivity: 93%;<br>non-subtype C sensitivity: 94%.                                                                                                                                                                |
| South Africa                                                                    | 10   | 246 patients/<br>Whatman No. 3<br>and No. 1 | Ultrasensitive p24<br>Ag ELISA<br>(Perkin Elmer)                                                                   | 96.6<br>(W. No. 1);<br>98.3<br>(W.903) | 100; 100        | Desiccant improved sensitivity<br>for storage > 6 weeks.                                                                                                                                                                          |
| Dominican<br>Republic,<br>United States,<br>Vietnam,<br>Malawi,<br>South Africa | 11   | 617 patients/<br>Whatman 903                | Modified Up24 Ag<br>(Perkin Elmer)                                                                                 | 94.4                                   | 100             | Storage of > 30 months<br>decreased sensitivity to 72.2%<br>(39/54 samples).                                                                                                                                                      |
| Malawi                                                                          | 12   | 222 patients                                | ELISA Alliance<br>HIV1 p24 without<br>ELAST<br>(Perkin Elmer)                                                      | 84                                     | 98              | Study only included clear<br>positives and negatives.                                                                                                                                                                             |
| <b>HIV 1 NAAT (DNA)</b>                                                         |      |                                             |                                                                                                                    |                                        |                 |                                                                                                                                                                                                                                   |
| South Africa                                                                    | 13   | 800 patients/<br>Whatman 903                | Amplicor HIV-1 DNA<br>v1.5 PCR (Roche)                                                                             | 99                                     | 99.8            |                                                                                                                                                                                                                                   |
| South Africa                                                                    | 14   | 300 patients/<br>Whatman No.1               | Amplicor HIV DNA<br>v1.5 PCR (Roche)                                                                               | 100                                    | 99.6            | On retesting false negatives,<br>sensitivity increased to 100%.                                                                                                                                                                   |
| South Africa                                                                    | 15   | 206 patients/<br>Whatman 903                | Amplicor HIV-1DNA<br>v1.5 PCR (Roche)                                                                              | 98.3                                   | 100             |                                                                                                                                                                                                                                   |

(continued)

SUPPLEMENTAL TABLE A  
Continued

| Disease, assay type, and country    | Ref. | Number of samples/filter paper type           | Test                                                       | Sensitivity (%)                                 | Specificity (%)                             | Notes                                                                                                                                                   |
|-------------------------------------|------|-----------------------------------------------|------------------------------------------------------------|-------------------------------------------------|---------------------------------------------|---------------------------------------------------------------------------------------------------------------------------------------------------------|
| Thailand                            | 16   | 162 patients/<br>Whatman 903                  | Amplicor HIV-1 DNA v. 1.5 PCR (Roche)                      | 100                                             | 100                                         |                                                                                                                                                         |
| Tanzania                            | 17   | 176 patients/<br>Whatman 903                  | Cobas AmpliPrep/<br>TaqMan<br>DNA (Roche)                  | 97                                              | 100                                         |                                                                                                                                                         |
| Tanzania                            | 18   | 325 patients/<br>Whatman 903                  | Amplicor HIV-1 DNA v1.5 PCR (Roche)                        | 98.3                                            | 99.6                                        | Same results for manual and automated methods.                                                                                                          |
| <b>HIV1 NAAT (RNA)</b>              |      |                                               |                                                            |                                                 |                                             |                                                                                                                                                         |
| Thailand                            | 16   | 162 patients/<br>Whatman 903                  | Manual NucliSENS (bioMerieux)                              | 100                                             | 100                                         | On average, HIV1 VL was 0.4 log lower in DBS after correction of sample volume.                                                                         |
| South Africa                        | 19   | 235 patients/<br>Whatman 903                  | NucliSens EasyQ (bioMerieux)                               | 100<br>( $< 3$ months);<br>100<br>(3–12 months) | 95.6<br>$< 3$ months;<br>100<br>3–12 months |                                                                                                                                                         |
| Senegal                             | 20   | 149 samples/<br>Whatman 903                   | NucliSens EASYQ HIV v1.2 (bioMerieux)                      | 100                                             | 100                                         | Age: 3 weeks to 24 months.                                                                                                                              |
| <b>HIV1 NAAT DNA and RNA</b>        |      |                                               |                                                            |                                                 |                                             |                                                                                                                                                         |
| South Africa                        | 15   | 800 patients/<br>Whatman 903                  | Cobas AmpliPrep/<br>TaqMan HIV-1<br>Qualitative<br>(Roche) | 99.7                                            | 100                                         | LoD: 1,090 copies/mL.                                                                                                                                   |
| Seven countries worldwide           | 21   | 291 samples/<br>Whatman 903                   | APTIMA HIV-1<br>RNA Qualitative<br>Assay (Gen-Probe)       | 99.2                                            | 100                                         | HIV1 LoD: 20–200 copies/mL in DBS potentially because of contribution of cellular RNA and DNA.                                                          |
| Tanzania                            | 17   | 176 patients/<br>Whatman 903                  | RealTime HIV-1<br>Quantitative<br>(Abbott)                 | 100                                             | 99                                          | Results at a threshold of $> 1,000$ copies/mL (100% for sensitivity and specificity at $> 10,000$ ).                                                    |
| United States                       | 22   | Spiked samples only/<br>Whatman 903           | APTIMA HIV-1<br>RNA Qualitative<br>Assay (Gen-Probe)       | 100                                             | NR                                          | For RNA vs. DNA at $> 1,000$ copies/mL (86% and 100% at $> 10,000$ ). LoD: $1 \times 6$ -mm punch = 10,217 copies/mL; 1 spot (13 mm) = 2,384 copies/mL. |
| South Africa                        | 23   | 494 patients/<br>Whatman 903                  | APTIMA HIV-1 RNA<br>Qualitative Assay<br>(Gen-Probe)       | 100                                             | 99.7                                        |                                                                                                                                                         |
| United States                       | 24   | 45 $\times$ 6 sets of samples/<br>Whatman 903 | Real-Time HIV-1<br>Qualitative<br>(Abbott)                 | NR                                              | 100                                         | LoD 95% Probit was 3,085 IU/mL.                                                                                                                         |
| <b>HTLV1 serology</b>               |      |                                               |                                                            |                                                 |                                             |                                                                                                                                                         |
| Japan, United Kingdom, South Africa | 25   | 26 patients/<br>Whatman 903                   | Latex Agglutination<br>Test, Serodia<br>HTLV1, (Fujirebio) | 100                                             | 100                                         | Based on a reference panel of samples of known positives.                                                                                               |
| <b>HTLV1 NAAT</b>                   |      |                                               |                                                            |                                                 |                                             |                                                                                                                                                         |
| Japan                               | 26   | 53 patients/<br>Whatman 903                   | In-house PCR                                               | 100                                             | 100                                         | DNA remained detectable after 7 weeks storage at room temperature.                                                                                      |

LoD = limit of detection; NR = not recorded; VL = viral load.

SUPPLEMENTAL TABLE B  
Summary of studies evaluating DBS for Hepatitis viruses

| Disease, assay type, and country | Ref. | Number of samples/filter paper type | Test                                              | Sensitivity (%) | Specificity (%) | Notes                                                                                                                             |
|----------------------------------|------|-------------------------------------|---------------------------------------------------|-----------------|-----------------|-----------------------------------------------------------------------------------------------------------------------------------|
| <b>HCV serology</b>              |      |                                     |                                                   |                 |                 |                                                                                                                                   |
| United Kingdom                   | 27   | 573 patients/<br>Whatman 903        | Ortho HCV 3.0<br>(Ortho Diagnostics)              | 99.2            | 100             | Adjusting cutoff can improve sensitivity.<br>Choice of elution buffer influences OD value.                                        |
| Australia                        | 28   | 183 patients/<br>Whatman 903        | Monolisa anti-HCV PLUS<br>Version 2 EIA (Bio-Rad) | 100             | 100             |                                                                                                                                   |
| France                           | 29   | 200 patients/<br>Whatman 903        | Ortho HCV 3.0<br>(Ortho Diagnostics)              | 99              | 98              |                                                                                                                                   |
| <b>HAV serology</b>              |      |                                     |                                                   |                 |                 |                                                                                                                                   |
| Spain                            | 30   | 298 patients/<br>Whatman 2992       | IMx ELISA (Abbott)                                | 91.3            | 99.3            |                                                                                                                                   |
| Brazil                           | 31   | 74 patients/<br>Whatman 903         | Bioelisa HAV-EIA<br>(Biokit)                      | 100             | 100             | Humoral response to vaccination also investigated using DBS.                                                                      |
| <b>HBV (HBsAg)</b>               |      |                                     |                                                   |                 |                 |                                                                                                                                   |
| Gambia                           | 32   | 209 patients/<br>Whatman BFC180     | Determine HBsAg<br>(Abbott)                       | 96              | 100             | Also performed $\alpha$ -foetoprotein tests on DBS samples for hepatocellular carcinoma.                                          |
| Brazil                           | 33   | 133 patients/<br>Whatman 903        | ETI-MAK4<br>(DiaSorin)                            | 97.6            | 96.7            |                                                                                                                                   |
| <b>HBV (anti-HBc)</b>            |      |                                     |                                                   |                 |                 |                                                                                                                                   |
| Brazil                           | 33   | 155 patients/<br>Whatman 903        | ETI-AB-COREK PLUS<br>(DiaSorin)                   | 90.5            | 92.6            | Storage at $-20^{\circ}\text{C}$ gave lowest OD variation, suggesting best storage condition.                                     |
| <b>HBV (anti-HBs)</b>            |      |                                     |                                                   |                 |                 |                                                                                                                                   |
| Brazil                           | 33   | 134 patients/<br>Whatman 903        | ETI-AB-AUK-3<br>(DiaSorin)                        | 78              | 97.3            |                                                                                                                                   |
| <b>HCV NAAT</b>                  |      |                                     |                                                   |                 |                 |                                                                                                                                   |
| Italy                            | 34   | 53 samples/<br>Whatman 903          | Versant HCV TMA<br>(Bayer)                        | 100             | > 95            | HCV RNA stable at room temperature for 11 months.<br>HCV RNA is susceptible to degradation; store DBS at $-20^{\circ}\text{C}$ .  |
| France                           | 29   | 200 patients/<br>Whatman 903        | Cobas Taqman HCV<br>(Roche)                       | 97              | NR              |                                                                                                                                   |
| <b>HEV NAAT</b>                  |      |                                     |                                                   |                 |                 |                                                                                                                                   |
| Sudan                            | 35   | 89 patients/<br>Whatman             | In-house PCR                                      | 84              | 88              | Multiple tests are necessary for HEV to obtain high sensitivity.<br>HEV viremia detectable for > 39 days after onset of jaundice. |
| Sudan                            | 35   | 92 patients/<br>Isocode Stix        | In-house PCR                                      | 93              | 96              |                                                                                                                                   |

SUPPLEMENTAL TABLE C  
Summary of studies evaluating DBS for herpesviruses, measles, and rubella

| Disease, assay type, and country     | Ref. | Number of samples/filter paper type        | Test                                                                | Sensitivity (%) | Specificity (%) | Notes                                                                                                                             |
|--------------------------------------|------|--------------------------------------------|---------------------------------------------------------------------|-----------------|-----------------|-----------------------------------------------------------------------------------------------------------------------------------|
| <b>CMV serology</b><br>United States | 36   | 75 patients/<br>Whatman 903                | CMV IgG<br>(Diamedix)                                               | 93              | 94              |                                                                                                                                   |
| <b>EBV serology</b><br>Indonesia     | 37   | 150 patients/<br>Whatman 903               | In-house IgA<br>ELISA                                               | 80; 96          | 100; 93.6       | Second number indicates performance on venous blood instead of capillary blood.                                                   |
| Indonesia                            | 37   | 150 patients/<br>Whatman No. 3             | In-house IgA<br>ELISA                                               | 75; 89          | 97; 97          | Second number indicates performance on venous blood instead of capillary blood.                                                   |
| <b>HSV serology</b><br>United States | 38   | 22 patients/<br>Whatman No. 3              | Herpesselect<br>(Focus)                                             | NR              | NR              |                                                                                                                                   |
| <b>Measles serology</b><br>Australia | 39   | 216 patients/<br>Whatman 903               | Enzygnost IgM<br>(Dade-Behring)                                     | 90.2            | 98.8            |                                                                                                                                   |
| Australia                            | 40   | 98 patients/<br>Whatman 903                | Enzygnost IgG<br>(Dade-Behring)                                     | 96.2            | 92              | DBS OD values were adjusted (OD = 1.28) to correlate with matching serum samples.                                                 |
| Uganda                               | 41   | 588 patients/<br>Whatman 903               | Enzygnost IgM<br>(Dade-Behring)                                     | 98.7            | 88.9            | 2-5 weeks after rash, collected samples were 100% sensitive and specific.                                                         |
| <b>Rubella serology</b><br>Peru      | 43   | 87 post-vaccination<br>samples/Whatman 903 | Captia IgM<br>(Sanofi);<br>Wampole IgG<br>(Alere)                   | NR; NR          | NR; NR          | 94% concordance (four DBS and three serum indeterminate results); 93% concordance (two DBS and four serum indeterminate results). |
| Australia                            | 44   | 88 patients/<br>Whatman 903                | Enzygnost IgM<br>(Dade-Behring)                                     | 96              | 100             |                                                                                                                                   |
| Peru                                 | 42   | 273 patients/<br>Whatman 903               | Enzygnost IgM<br>(Dade-Behring);<br>Enzygnost IgG<br>(Dade-Behring) | 98; 99          | 97; 98          |                                                                                                                                   |
| United Kingdom                       | 45   | 73 samples;<br>79 samples/<br>Whatman 903  | Enzygnost IgG<br>(Dade-Behring);<br>IgG ELISA (Diesse)              | NR; NR          | NR; NR          |                                                                                                                                   |
| <b>CMV NAAT</b><br>Italy             | 46   | 195 patients/<br>Whatman 903               | CMV Early Oligo Mix<br>(Bioline-Amplimedical)                       | 100             | 100             | LoD 4,000 copies/mL whole blood.                                                                                                  |

SUPPLEMENTAL TABLE D

Summary of key studies evaluating the diagnosis of infectious diseases on filter paper using samples other than whole blood

| Sample type                                                                                                                                | Notes                                                                                                                                                                                                                                                                                                                                                                                                                                                                                                                                                                                                                                                                                                                                                                                                                                                               | Refs.  |
|--------------------------------------------------------------------------------------------------------------------------------------------|---------------------------------------------------------------------------------------------------------------------------------------------------------------------------------------------------------------------------------------------------------------------------------------------------------------------------------------------------------------------------------------------------------------------------------------------------------------------------------------------------------------------------------------------------------------------------------------------------------------------------------------------------------------------------------------------------------------------------------------------------------------------------------------------------------------------------------------------------------------------|--------|
| <b>Bone marrow</b>                                                                                                                         |                                                                                                                                                                                                                                                                                                                                                                                                                                                                                                                                                                                                                                                                                                                                                                                                                                                                     |        |
| Visceral leishmaniasis PCR                                                                                                                 | PCR positive in 34 of 35 dried bone marrow samples from patients clinically suspected of having visceral leishmaniasis.                                                                                                                                                                                                                                                                                                                                                                                                                                                                                                                                                                                                                                                                                                                                             | 47     |
| <b>Serum</b>                                                                                                                               |                                                                                                                                                                                                                                                                                                                                                                                                                                                                                                                                                                                                                                                                                                                                                                                                                                                                     |        |
| Hepatitis A IgM, IgG, and PCR<br>Hepatitis C PCR<br>HIV ELISA                                                                              | Hepatitis A IgM and IgG ELISAs were both 100% sensitive and specific compared with serum. HIV ELISA was able to detect infections of less than 6-months duration with a sensitivity of 83%. Hepatitis A PCR was 92.3% sensitive and 100% specific, and Hepatitis C PCR was 100% sensitive and specific compared with serum, although with a very small sample size. Both Hepatitis A and C showed a 10-fold drop in viral load after 4 weeks of storage at room temperature.                                                                                                                                                                                                                                                                                                                                                                                        | 48–50  |
| <b>Plasma</b>                                                                                                                              |                                                                                                                                                                                                                                                                                                                                                                                                                                                                                                                                                                                                                                                                                                                                                                                                                                                                     |        |
| HIV quantitative PCR                                                                                                                       | Good correlation was observed in all three studies between whole plasma and dried plasma spots and also between DBS and dried plasma. HIV RNA was more stable stored on paper at room temperature than as whole liquid plasma, and it was stable for more than 1 year.                                                                                                                                                                                                                                                                                                                                                                                                                                                                                                                                                                                              | 51–53  |
| <b>Buffy coat</b>                                                                                                                          |                                                                                                                                                                                                                                                                                                                                                                                                                                                                                                                                                                                                                                                                                                                                                                                                                                                                     |        |
| HIV proviral DNA PCR                                                                                                                       | 100% concordance of proviral DNA extracted from dried buffy coat spots with DNA extracted from whole blood.                                                                                                                                                                                                                                                                                                                                                                                                                                                                                                                                                                                                                                                                                                                                                         | 54     |
| <b>Skin lesion samples</b>                                                                                                                 |                                                                                                                                                                                                                                                                                                                                                                                                                                                                                                                                                                                                                                                                                                                                                                                                                                                                     |        |
| Cutaneous leishmaniasis PCR on dried skin exudates<br>Leprosy PCR on slit skin smears                                                      | Leishmaniasis sensitivity ranged from 92.3% to 100% and specificity was up to 100% using PCR compared with PCR performed directly on tissue samples. Filter paper was comparable with PCR on tissue and superior to microscopy and culture. Leishmania speciation was also successfully performed; 116 of 192 multibacillary leprosy patients were positive on FTA Elute paper. Equivalent to standard method of storage in 70% ethanol.                                                                                                                                                                                                                                                                                                                                                                                                                            | 55–58  |
| <b>Breast milk</b>                                                                                                                         |                                                                                                                                                                                                                                                                                                                                                                                                                                                                                                                                                                                                                                                                                                                                                                                                                                                                     |        |
| HIV quantitative PCR                                                                                                                       | No statistical difference between viral load in dried breast milk and breast milk in lysis buffer (gold standard).                                                                                                                                                                                                                                                                                                                                                                                                                                                                                                                                                                                                                                                                                                                                                  | 51     |
| <b>Sputum</b>                                                                                                                              |                                                                                                                                                                                                                                                                                                                                                                                                                                                                                                                                                                                                                                                                                                                                                                                                                                                                     |        |
| HIV PCR<br>Measles PCR<br>HHV 6 and 7 PCR<br>Tuberculosis PCR<br>Malaria ( <i>P. falciparum</i> ) PCR<br><i>Pneumocystis jirovecii</i> PCR | Low sensitivity for the detection of HIV RNA in saliva compared with whole blood. Dried saliva was less sensitive than whole saliva and nose/throat swab for measles by PCR; 67% of serologically confirmed cases were positive by PCR. Sensitivity and specificity for HHV 6 and 7 were comparable with whole saliva samples. <i>M. tuberculosis</i> PCR sensitivity was 82%, and specificity was 96% (greater than microscopy). DNA was detected even after 6 months of storage at room temperature. Thickest parts of purulent sputum must be applied to paper. Malaria DNA was detectable in saliva and urine. Sensitivity was poor compared with microscopy. Refinements to methods were required. Induced sputum and bronchoalveolar lavage dried on paper had similar sensitivity and specificity of 67% and 90–91%, respectively, compared with direct PCR. | 59–64  |
| <b>Cervical sample</b>                                                                                                                     |                                                                                                                                                                                                                                                                                                                                                                                                                                                                                                                                                                                                                                                                                                                                                                                                                                                                     |        |
| HPV PCR                                                                                                                                    | Two studies reported excellent concordance of 94–100% between filter paper and cervical smear or cytobrush samples. <sup>65,66</sup> Banura and others <sup>67</sup> found low agreement with a $\kappa$ of only 0.18. HPV DNA was stable for 1 year at room temperature.                                                                                                                                                                                                                                                                                                                                                                                                                                                                                                                                                                                           | 65–67  |
| <b>Stool</b>                                                                                                                               |                                                                                                                                                                                                                                                                                                                                                                                                                                                                                                                                                                                                                                                                                                                                                                                                                                                                     |        |
| <i>Vibrio cholerae</i> culture<br><i>Enterocytozoon bienersi</i> PCR<br>Adenovirus 40 and 41 PCR<br>Norovirus PCR<br>Rotavirus PCR         | There was no significant difference between filter paper and standard transport medium for culture of <i>V. cholerae</i> after 14 days of storage when kept moist. Viral enteric pathogens are all readily stored and identified by PCR from filter paper after up to 4 months. The use of SDS/EDTA-impregnated paper inactivates the pathogens.                                                                                                                                                                                                                                                                                                                                                                                                                                                                                                                    | 68–72  |
| <b>Urine</b>                                                                                                                               |                                                                                                                                                                                                                                                                                                                                                                                                                                                                                                                                                                                                                                                                                                                                                                                                                                                                     |        |
| CMV PCR                                                                                                                                    | 90% concordance with direct urine DNA extraction and PCR.                                                                                                                                                                                                                                                                                                                                                                                                                                                                                                                                                                                                                                                                                                                                                                                                           | 73     |
| <b>Cerebrospinal fluid</b>                                                                                                                 |                                                                                                                                                                                                                                                                                                                                                                                                                                                                                                                                                                                                                                                                                                                                                                                                                                                                     |        |
| <i>Streptococcus pneumoniae</i> and <i>Haemophilus influenzae</i> PCR<br>Neurocysticercosis ELISA                                          | Sensitivity and specificity for <i>S. pneumoniae</i> and <i>H. influenzae</i> were 92% and 70% and 99% and 100%, respectively. There was good correlation in genome counts between liquid and dried CSF. High specificity of > 90% but low sensitivities of 52–63% were seen depending on the type of paper used.                                                                                                                                                                                                                                                                                                                                                                                                                                                                                                                                                   | 74, 75 |

SUPPLEMENTAL TABLE E  
References of excluded in-house assays

| In-house assay    | Refs.     |
|-------------------|-----------|
| HIV               | 50, 76–95 |
| Hepatitis B and C | 77, 96–98 |
| CMV               | 99–106    |
| Measles           | 107–109   |
| Rubella           | 110       |

SUPPLEMENTAL TABLE F

STARD checklist for reporting of studies of diagnostic accuracy with suggested additions for filter paper and body fluid evaluation studies  
(version August 2012)

| Section and topic       | Item                                                                                                                                                                                                                                                   |
|-------------------------|--------------------------------------------------------------------------------------------------------------------------------------------------------------------------------------------------------------------------------------------------------|
| Title/abstract/keywords | 1 Identify the article as a study of diagnostic accuracy (recommend MeSH heading sensitivity and specificity).                                                                                                                                         |
| Title/abstract/keywords | 2 Make use of terminology (i.e., DBS, dried serum spots, dried urine spots, dried fluid spots, etc.) or samples type X dried on filter paper.                                                                                                          |
| Introduction            | 3 State the research questions or study aims, such as estimating diagnostic accuracy or comparing accuracy between sample types or across participant groups.                                                                                          |
| <b>Methods</b>          |                                                                                                                                                                                                                                                        |
| Participants            | 4 The study population: the inclusion and exclusion criteria, setting, and locations where data were collected.                                                                                                                                        |
| Participants            | 5 Participant recruitment: was recruitment based on presenting symptoms, results from previous tests, or the fact that the participants had received the index tests or the reference standard?                                                        |
| Participants            | 6 Participant sampling: was the study population a consecutive series of participants defined by the selection criteria in items 3 and 4? If not, specify how participants were further selected.                                                      |
| Participants            | 7 Data collection: was data collection planned before the index test and reference standard were performed (prospective study) or after (retrospective study)?                                                                                         |
| Participants            | 8 Sample collection: state which filter paper was used (including catalogue number, manufacturer and weight), which and how fluids were obtained and spotted onto filter paper, and the drying period before storage.                                  |
| Test methods            | 9 The reference standard and its collection, storage, and transportation details. If reference sample was not performed with the same tests or manner as the index sample, provide detailed rationale.                                                 |
| Test methods            | 10 The index sample and its collection, storage, and transportation details. Provide detailed rationale for discordances in methods between index and reference test.                                                                                  |
| Test methods            | 11 Sample processing: state the time and storage conditions (humidity control and temperature) at the field, during transportation, and at the laboratory, preferably in a tabled manner.                                                              |
| Test methods            | 12 Punching method with reference to source or manufacturer and cleaning procedure if used.                                                                                                                                                            |
| Test methods            | 13 Technical specifications of material and methods involved, including how and when measurements were taken, and/or cite references for index tests and reference standard.                                                                           |
| Test methods            | 14 Definition of and rationale for the units, cutoffs, and/or categories of the results of the index sample and the reference standard.                                                                                                                |
| Test methods            | 15 For quantitative or numerical test results, indicate the calculation methods and rationale of the index and reference standard.                                                                                                                     |
| Test methods            | 16 The number, training, and expertise of the persons executing and reading the index sample and the reference standard.                                                                                                                               |
| Test methods            | 17 Whether the readers of the index tests and reference standard were blind (masked) to the results of the other test; describe any other clinical information available to the readers.                                                               |
| Statistical methods     | 18 Methods for calculating or comparing measures of diagnostic accuracy and bias (e.g., Bland Altman) and the statistical methods used to quantify uncertainty (e.g., 95% confidence intervals).                                                       |
| Statistical methods     | 19 Methods for calculating test reproducibility and lower limit of detection if done.                                                                                                                                                                  |
| Statistical methods     | 20 For quantitative test outcomes, the mean and range of results for index and reference tests.                                                                                                                                                        |
| <b>Results</b>          |                                                                                                                                                                                                                                                        |
| Participants            | 21 When study was performed, including beginning and end dates of recruitment.                                                                                                                                                                         |
| Participants            | 22 Clinical and demographic characteristics of the study population (at least information on age, sex, and spectrum of presenting symptoms).                                                                                                           |
| Participants            | 23 The number of participants satisfying the criteria for inclusion who did or did not undergo the index tests and/or the reference standard; describe why participants failed to undergo either test (a flow diagram is strongly recommended).        |
| Test results            | 24 Time interval between the index tests and the reference standard and any treatment administered in the interval.                                                                                                                                    |
| Test results            | 25 Distribution of severity of disease (define criteria) in those participants with the target condition; other diagnoses in participants without the target condition.                                                                                |
| Test results            | 26 A cross-tabulation of the results of the index tests (including indeterminate and missing results) by the results of the reference standard; for continuous results, the distribution of the test results by the results of the reference standard. |
| Test results            | 27 Any adverse events from performing the index tests or the reference standard.                                                                                                                                                                       |
| Estimates               | 28 Estimates of diagnostic accuracy and measures of statistical uncertainty (e.g., 95% confidence intervals).                                                                                                                                          |
| Estimates               | 29 For quantitative test outcomes, estimates of diagnostic accuracy and measures of statistical uncertainty (e.g., 95% confidence intervals) by quantitative grouped ranges (e.g., 1,000–5,000 copies/mL).                                             |
| Estimates               | 30 How indeterminate results, missing data, and outliers of the index tests were handled.                                                                                                                                                              |
| Estimates               | 31 Estimates of variability of diagnostic accuracy between subgroups of participants, readers, or centers if done.                                                                                                                                     |
| Estimates               | 32 Estimates of test reproducibility if done.                                                                                                                                                                                                          |
| Discussion              | 33 Discuss the clinical applicability of the study findings.                                                                                                                                                                                           |

## SUPPLEMENTAL APPENDIX 1: REVIEW OF THE CLINICAL USE OF FILTER PAPER IN INFECTIOUS DISEASES DRAFT PROTOCOL

**Review team.** Pieter W. Smit, Ivo Elliott, Rosanna W. Peeling, David Mabey, and Paul N. Newton.

**Review objectives.** *Primary objective.* To assess the use of dried blood spots (DBS) for the diagnosis or surveillance of infectious diseases.

*Secondary objective.* To assess the practical aspects and implications of using DBS compared with non-filter paper samples.

*Tertiary objective.* To assess the use of filter paper for diagnosis or surveillance for samples other than whole blood and animal pathogens.

### PICOS

**Participants.** Studies evaluating the use of DBS as a replacement for a gold standard sample (e.g. plasma, serum, and whole blood) for any infectious disease diagnostic or surveillance assay.

**Interventions (diagnostic assays adapted for DBS samples).** Where a well-recognized commercially available technology exists for the diagnosis or surveillance of infectious diseases with DBS samples, the technology was used, and in-house assays were excluded.

**Reference standard/comparators.** The same commercially available technology for the diagnosis or surveillance of infectious diseases with gold standard samples (e.g., plasma, serum, and whole blood).

**Outcomes.** Include studies evaluating DBS for quantitative as well as qualitative analysis of nucleic acid testing against plasma samples (DNA and RNA single- or double-stranded) for the purpose of diagnosing/detecting infection.

Include studies evaluating DBS for Ab/Ag detection as diagnostics, cutoff determination, and protocol development (combined with commercially available assays).

**Study design.** Include evaluative studies using an acceptable reference technology and comparative studies.

**Other.** Include English language only from 1980 to present.

### IDENTIFYING RESEARCH EVIDENCE

**Search strategy.** Databases: MEDLINE and EMBASE.

**Search terms.** Search terms for MEDLINE and EMBASE:

Ti,ab = keyword (title and abstract)

Mp= keyword (free text)

1. “dried blood”.ti,ab
2. “blood spot\*”.ti,ab
3. DBS.mp
4. “filter paper”.ti,ab,
5. “Guthrie filter”.ti,ab
6. “filter card\*”.ti,ab
7. “whatman paper”.ti,ab
8. “FTA\*”.ti,ab
9. “Flinders Associates Technology”
10. “Guthrie paper”. ti,ab
11. “dried serum\*”.ti,ab
12. “serum spot\*”.ti,ab

13. “filter card\*”.ti,ab
14. “filter disc\*”.ti,ab
15. “filter disk\*”.ti,ab
16. “blotting paper”.ti,ab
17. “Guthrie card”.ti,ab
18. “Isocode stix”.ti,ab

The following disorders and tests are commonly performed using DBS samples and were excluded: congenital hypothyroidism, phenylketonuria, cystic fibrosis, sickle cell disease, Tay–Sachs disease, hemoglobinopathies, galactosidase, spinal muscular atrophy, isovaleric acidemia, maple syrup urine, cholesterol, triglycerides, HbA1c, human growth hormone, insulin, and mercury. Other key words often associated with the search terms but not relevant to this review were also excluded: MRI, MR, CT, PET, N-glycan, pharmacokinetic, and pharmacodynamic.

**Date.** 1980 to present.

**Language.** English.

**Publication type/status.** Published works in peer-reviewed journals.

**Study selection.**

Stage 1: screening of titles/abstracts against inclusion criteria.

Titles and abstracts, where available, will be screened and either accepted, rejected as not relevant, or rejected because of failure to meet inclusion criteria (if so, the reason will be specified).

Stage 2: full papers obtained and assessed against inclusion criteria. Papers will be either accepted or rejected because of failure to meet inclusion criteria, and the reason will be specified.

Full papers will be independently assessed by two members of the review team, and results will be cross-checked and combined.

**Inclusion criteria.**

Evaluation or comparison of performances of commercially available (where they exist and are well-recognized) DNA/RNA assays with DBS and reference sampling methods.

Evaluation or comparison of performances of commercially available (where they exist and are well-recognized) antibody/antigen assays with DBS and reference sampling methods.

Any human pathogen.

Evaluations based on human clinical or reference materials.

**Exclusion criteria.**

Not an evaluation study or not having a correct reference sample or reference method.

In-house developed assays, except where no well-recognized, commercially available assays exist.

Full article not accessible.

Studies with other primary aims than evaluation of DBS with reference samples (but keep these articles for review of practical aspects and implications of filter paper use).

Studies related to drug resistance screening, genotyping, sequencing, and other non-diagnostic evaluations.

Studies using filter paper for non-whole blood samples (urine, stool, cervical swabs, serum, plasma, saliva, cerebrospinal fluid, etc.; but include for separate discussion).



Animal pathogens (but include for separate discussion).  
Any non-infectious diseases included in neonatal screening programs.

| Data extraction                                             |
|-------------------------------------------------------------|
| General information                                         |
| Date of data extraction                                     |
| Identification features of the study                        |
| Record number                                               |
| Author                                                      |
| Article title                                               |
| Citation                                                    |
| Study characteristics                                       |
| Aim/objectives of the study                                 |
| Disease                                                     |
| Filter paper type                                           |
| Participant/sample characteristics                          |
| Characteristics of population from which samples were drawn |
| Age                                                         |
| Sex                                                         |
| Number of samples                                           |
| Sample country/region of origin                             |
| Sample type (finger prick/EDTA)                             |
| DBS storage                                                 |
| At research site                                            |
| At laboratory                                               |
| Type of reference sample                                    |
| DBS quality check performed?                                |
| Technology                                                  |
| Name and manufacturer of assays under evaluation            |
| Extraction method                                           |
| Extraction volume/adjustments                               |
| Extraction kit/method used                                  |
| Detection method                                            |
| If quantitative, adjusted for DBS sample input?             |
| Outcome data/results                                        |
| Unit of assessment/analysis                                 |
| Outcomes                                                    |
| NA                                                          |
| Mean pathogen load $\pm$ SD                                 |
| Range of pathogen load                                      |
| Correlation ( $r$ )                                         |
| Bias (mean difference)                                      |
| Sensitivity, cutoff                                         |
| Specificity, cutoff                                         |
| Percent CV index test, reference test                       |
| Serology                                                    |
| Sensitivity, cutoff                                         |
| Specificity, cutoff                                         |
| Cutoff adjusted for DBS?                                    |
| Titer lower limit of detection                              |
| For each pre-specified outcome                              |
| Reported (yes/no)                                           |
| Definition used in study                                    |
| Additional outcomes reported                                |
| Details of any additional relevant outcomes reported        |

**Practical aspects and implications of filter paper.** To fulfill the second objective of this review, the following information will be collected from publications combined with our experience.

All articles excluded after stage 1 are reviewed that fulfill the criteria: provide a better understanding of DBS samples regarding card types, filter paper characteristics, collection, storage, extraction, environmental effects, stability, punch methods, cost compared with reference methods, transportation, policy and regulations, recommendations made by leading organizations (WHO and CDC), and other related topics that could improve understanding of filter paper.

| Data extracted                       |
|--------------------------------------|
| General information                  |
| Date of data extraction              |
| Identification features of the study |
| Record number                        |
| Author                               |
| Article title                        |
| Citation                             |
| Assay details                        |
| Disease                              |
| DBS topic                            |
| Results                              |
| Key findings                         |

**Use of filter paper for non-whole blood samples.** To fulfill the third objective of this review, the following information will be collected from publications.

All articles that are excluded at stage 1 can be included; make use of alternative samples stored on filter paper, such as serum, plasma, stool, urine, CSF, etc.

| Data extracted                       |
|--------------------------------------|
| General information                  |
| Date of data extraction              |
| Identification features of the study |
| Record number                        |
| Author                               |
| Article title                        |
| Citation                             |
| Study details                        |
| Disease                              |
| Sample type                          |
| DBS topic                            |
| Assay details                        |
| Extraction method                    |
| Detection method                     |
| Results                              |
| Sensitivity                          |
| Specificity                          |
| Key findings                         |

## REFERENCES

- Boillot F, Peeters M, Kosia A, Delaporte E, 1997. Prevalence of the human immunodeficiency among patients with tuberculosis in Sierra Leone, established from dried blood spots on filter paper. *Int J Tuberc Lung Dis* 1: 493–497.
- Solomon SS, Solomon S, Rodriguez II, McGarvey ST, Ganesh AK, Thyagarajan SP, Mahajan AP, Mayer KH, 2002. Dried blood spots (DBS): a valuable tool for HIV surveillance in developing/tropical countries. *Int J STD AIDS* 13: 25–28.
- Mashange W, Soko W, Gomo E, 2003. Validation of a simple and cheap gelatin particle agglutination test for human immunodeficiency virus using dried blood spot samples. *Cent Afr J Med* 49: 5–8.
- Sarge-Njie R, Schim Van Der Loeff M, Ceesay S, Cubitt D, Sabally S, Corrah T, Whittle H, 2006. Evaluation of the dried blood spot filter paper technology and five testing strategies of HIV-1 and HIV-2 infections in West Africa. *Scand J Infect Dis* 38: 1050–1056.
- Lakshmi V, Sudha T, Bhanurekha M, Dandona L, 2007. Evaluation of the Murex HIV Ag/Ab Combination assay when used with dried blood spots. *Clin Microbiol Infect* 13: 1134–1136.
- Castro AC, Borges LG, Souza Rda S, Grudzinski M, D’Azevedo PA, 2008. Evaluation of the human immunodeficiency virus type 1 and 2 antibodies detection in dried whole blood spots (DBS) samples. *Rev Inst Med Trop Sao Paulo* 50: 151–156.
- Chaillet P, Zachariah R, Harries K, Rusanganwa E, Harries AD, 2009. Dried blood spots are a useful tool for quality



- assurance of rapid HIV testing in Kigali, Rwanda. *Trans R Soc Trop Med Hyg* 103: 634–637.
8. Patton JC, Sherman GG, Coovadia AH, Stevens WS, Meyers TM, 2006. Ultrasensitive human immunodeficiency virus type 1 p24 antigen assay modified for use on dried whole-blood spots as a reliable, affordable test for infant diagnosis. *Clin Vaccine Immunol* 13: 152–155.
  9. Knuchel MC, Jullu B, Shah C, Tomasik Z, Stoeckle MP, Speck RF, Nadal D, Mshinda H, Boni J, Tanner M, Schupbach J, 2007. Adaptation of the ultrasensitive HIV-1 p24 antigen assay to dried blood spot testing. *J Acquir Immune Defic Syndr* 44: 247–253.
  10. Patton JC, Coovadia AH, Meyers TM, Sherman GG, 2008. Evaluation of the ultrasensitive human immunodeficiency virus type 1 (HIV-1) p24 antigen assay performed on dried blood spots for diagnosis of HIV-1 infection in infants. *Clin Vaccine Immunol* 15: 388–391.
  11. Cachafeiro A, Sherman GG, Sohn AH, Beck-Sague C, Fiscus SA, 2009. Diagnosis of human immunodeficiency virus type 1 infection in infants by use of dried blood spots and an ultrasensitive p24 antigen assay. *J Clin Microbiol* 47: 459–462.
  12. Mwapasa V, Cachafeiro A, Makuta Y, Beckstead DJ, Pennell ML, Chilima B, Mwangomba B, Fiscus SA, Kwiek JJ, 2010. Using a simplified human immunodeficiency virus type 1 p24 antigen assay to diagnose pediatric HIV-infection in Malawi. *J Clin Virol* 49: 299–302.
  13. Sherman GG, Stevens G, Jones SA, Horsfield P, Stevens WS, 2005. Dried blood spots improve access to HIV diagnosis and care for infants in low-resource settings. *J Acquir Immune Defic Syndr* 38: 615–617.
  14. Patton JC, Akkers E, Coovadia AH, Meyers TM, Stevens WS, Sherman GG, 2007. Evaluation of dried whole blood spots obtained by heel or finger stick as an alternative to venous blood for diagnosis of human immunodeficiency virus type 1 infection in vertically exposed infants in the routine diagnostic laboratory. *Clin Vaccine Immunol* 14: 201–203.
  15. Stevens W, Erasmus L, Moloi M, Taleng T, Sarang S, 2008. Performance of a novel human immunodeficiency virus (HIV) type 1 total nucleic acid-based real-time PCR assay using whole blood and dried blood spots for diagnosis of HIV in infants. *J Clin Microbiol* 46: 3941–3945.
  16. Leelawiwat W, Young NL, Chaowanachan T, Ou CY, Culnane M, Vanprapa N, Waranawat N, Wasinraep P, Mock PA, Tappero J, McNicholl JM, 2009. Dried blood spots for the diagnosis and quantitation of HIV-1: stability studies and evaluation of sensitivity and specificity for the diagnosis of infant HIV-1 infection in Thailand. *J Virol Methods* 155: 109–117.
  17. Lofgren SM, Morrissey AB, Chevallier CC, Malabeja AI, Edmonds S, Amos B, Sifuna DJ, von Seidlein L, Schimana W, Stevens WS, Bartlett JA, Crump JA, 2009. Evaluation of a dried blood spot HIV-1 RNA program for early infant diagnosis and viral load monitoring at rural and remote healthcare facilities. *AIDS* 23: 2459–2466.
  18. Nsojo A, Aboud S, Lyamuya E, 2010. Comparative evaluation of amplicor HIV-1 DNA test, version 1.5, by manual and automated dna extraction methods using venous blood and dried blood spots for HIV-1 DNA pcr testing. *Tanzan J Health Res* 12: 229–235.
  19. Lilian RR, Bhowan K, Sherman GG, 2010. Early diagnosis of human immunodeficiency virus-1 infection in infants with the NucliSens EasyQ assay on dried blood spots. *J Clin Virol* 48: 40–43.
  20. Kebe K, Ndiaye O, Diop Ndiaye H, Mbakob Mengue P, Guindo PMM, Diallo S, Leye N, Gueye SB, Gaye Diallo A, Toure Kane C, Mboup S, 2011. RNA versus DNA (NucliSENS EasyQ HIV-1 v1.2 versus Amplicor HIV-1 DNA test v1.5) for early diagnosis of HIV-1 infection in infants in Senegal. *J Clin Microbiol* 49: 2590–2593.
  21. Kerr RJ, Player G, Fiscus SA, Nelson JA, 2009. Qualitative human immunodeficiency virus RNA analysis of dried blood spots for diagnosis of infections in infants. *J Clin Microbiol* 47: 220–222.
  22. Nugent CT, Dockter J, Bernardin F, Hecht R, Smith D, Delwart E, Pilcher C, Richman D, Busch M, Giachetti C, 2009. Detection of HIV-1 in alternative specimen types using the APTIMA HIV-1 RNA Qualitative Assay. *J Virol Methods* 159: 10–14.
  23. Stevens WS, Noble L, Berrie L, Sarang S, Scott LE, 2009. Ultra-high-throughput, automated nucleic acid detection of human immunodeficiency virus (HIV) for infant infection diagnosis using the Gen-Probe Aptima HIV-1 screening assay. *J Clin Microbiol* 47: 2465–2469.
  24. Huang S, Erickson B, Mak WB, Salituro J, Abravaya K, 2011. A novel RealTime HIV-1 Qualitative assay for the detection of HIV-1 nucleic acids in dried blood spots and plasma. *J Virol Methods* 178: 216–224.
  25. Parker SP, Taylor MB, Ades AE, Cubitt WD, Peckham C, 1995. Use of dried blood spots for the detection and confirmation of HTLV-I specific antibodies for epidemiological purposes. *J Clin Pathol* 48: 904–907.
  26. Noda S, Eizuru Y, Minamishima Y, Ikenoue T, Mori N, 1993. Detection of human T-cell lymphotropic virus type 1 infection by the polymerase chain reaction using dried blood specimens on filter papers. *J Virol Methods* 43: 111–122.
  27. Judd A, Parry J, Hickman M, McDonald T, Jordan L, Lewis K, Contreras M, Dusheiko G, Foster G, Gill N, Kemp K, Main J, Murray-Lyon I, Nelson M, 2003. Evaluation of a modified commercial assay in detecting antibody to hepatitis C virus in oral fluids and dried blood spots. *J Med Virol* 71: 49–55.
  28. Croom HA, Richards KM, Best SJ, Francis BH, Johnson EI, Dax EM, Wilson KM, 2006. Commercial enzyme immunoassay adapted for the detection of antibodies to hepatitis C virus in dried blood spots. *J Clin Virol* 36: 68–71.
  29. Tuailon E, Mondain AM, Meroueh F, Ottomani L, Picot MC, Nagot N, Van de Perre P, Ducos J, 2010. Dried blood spot for hepatitis C virus serology and molecular testing. *Hepatology* 51: 752–758.
  30. Gil A, Gonzalez A, Dal-Re R, Dominguez V, Astasio P, Aguilar L, 1997. Detection of antibodies against hepatitis A in blood spots dried on filter paper. Is this a reliable method for epidemiological studies? *Epidemiol Infect* 118: 189–191.
  31. Melgaco JG, Pinto MA, Rocha AM, Freire M, Gaspar LP, Lima SM, Cruz OG, Vitral CL, 2011. The use of dried blood spots for assessing antibody response to hepatitis A virus after natural infection and vaccination. *J Med Virol* 83: 208–217.
  32. Mendy M, Kirk GD, van der Sande M, Jeng-Barry A, Lesi OA, Hainaut P, Sam O, McConkey S, Whittle H, 2005. Hepatitis B surface antigenaemia and alpha-foetoprotein detection from dried blood spots: applications to field-based studies and to clinical care in hepatitis B virus endemic areas. *J Viral Hepat* 12: 642–647.
  33. Villar LM, Oliveira JCD, Cruz HM, Fumiko C, Yoshida T, Lampe E, Lewis-ximenez LL, 2011. Assessment of Dried Blood Spot Samples as a Simple Method for Detection of Hepatitis B Virus Markers. *J Med Virol* 1529: 1522–1529.
  34. Solmone M, Girardi E, Costa F, Pucillo L, Ippolito G, Capobianchi MR, 2002. Simple and reliable method for detection and genotyping of hepatitis C virus RNA in dried blood spots stored at room temperature. *J Clin Microbiol* 40: 3512–3514.
  35. Merens A, Guerin PJ, Guthmann JP, Nicand E, 2009. Outbreak of hepatitis E virus infection in Darfur, Sudan: effectiveness of real-time reverse transcription-PCR analysis of dried blood spots. *J Clin Microbiol* 47: 1931–1933.
  36. Dowd JB, Aiello AE, Chyu L, Huang YY, McDade TW, 2011. Cytomegalovirus antibodies in dried blood spots: A minimally invasive method for assessing stress, immune function, and aging. *Immun Ageing* 8: 3.
  37. Fachiroh J, Prasetyanti PR, Paramita DK, Prasetyawati AT, Anggrahini DW, Haryana SM, Middeldorp JM, 2008. Dried-blood sampling for Epstein-Barr virus immunoglobulin G (IgG) and IgA serology in nasopharyngeal carcinoma screening. *J Clin Microbiol* 46: 1374–1380.
  38. Hogrefe WR, Ernst C, Su X, 2002. Efficiency of reconstitution of immunoglobulin G from blood specimens dried on filter paper and utility in herpes simplex virus type-specific serology screening. *Clin Diagn Lab Immunol* 9: 1338–1342.
  39. Riddell MA, Leydon JA, Catton MG, Kelly HA, 2002. Detection of Measles Virus-Specific Immunoglobulin M in Dried

- Venous Blood Samples by Using a Commercial Enzyme Immunoassay. *J Clin Microbiol* 40: 5–9.
40. Riddell MA, Byrnes GB, Leydon JA, Kelly HA, 2003. Dried venous blood samples for the detection and quantification of measles IgG using a commercial enzyme immunoassay. *Bull World Health Organ* 81: 701–707.
  41. Uzicanin A, Lubega I, Nanuyanja M, Mercader S, Rota P, Bellini W, Helfand R, 2011. Dried blood spots on filter paper as an alternative specimen for measles diagnostics: detection of measles immunoglobulin M antibody by a commercial enzyme immunoassay. *J Infect Dis* 204: S564–S569.
  42. Helfand RF, Cabezas C, Abernathy E, Castillo-Solorzano C, Ortiz AC, Sun H, Osoreo F, Oliveira L, Whittombury A, Charles M, Andrus J, Icenogle J, 2007. Dried blood spots versus sera for detection of rubella virus-specific immunoglobulin M (IgM) and IgG in samples collected during a rubella outbreak in Peru. *Clin Vaccine Immunol* 14: 1522–1525.
  43. Helfand RF, Keyserling HL, Williams I, Murray A, Mei J, Moscattello C, Icenogle J, Bellini WJ, 2001. Comparative detection of measles and rubella IgM and IgG derived from filter paper blood and serum samples. *J Med Virol* 65: 751–757.
  44. Karapanagiotidis T, Riddell M, Kelly H, 2005. Detection of rubella immunoglobulin M from dried venous blood spots using a commercial enzyme immunoassay. *Diagn Microbiol Infect Dis* 53: 107–111.
  45. Hardelid P, Williams D, Dezateux C, Cubitt WD, Peckham CS, Tookey PA, Cortina-Borja M, 2008. Agreement of rubella IgG antibody measured in serum and dried blood spots using two commercial enzyme-linked immunosorbent assays. *J Med Virol* 80: 360–364.
  46. Binda S, Caroppo S, Dido P, Primache V, Veronesi L, Calvario A, Piana A, Barbi M, 2004. Modification of CMV DNA detection from dried blood spots for diagnosing congenital CMV infection. *J Clin Virol* 30: 276–279.
  47. Alam MZ, Shamsuzzaman AKM, Kuhls K, Schonian G, 2009. PCR diagnosis of visceral leishmaniasis in an endemic region, Mymensingh district, Bangladesh. *Trop Med Int Health* 14: 499–503.
  48. Desbois D, Roque-Afonso AM, Lebraud P, Dussaix E, 2009. Use of dried serum spots for serological and molecular detection of hepatitis A virus. *J Clin Microbiol* 47: 1536–1542.
  49. Abe K, Konomi N, 1998. Hepatitis C virus RNA in dried serum spotted onto filter paper is stable at room temperature. *J Clin Microbiol* 36: 3070–3072.
  50. Barin F, Meyer L, Lancar R, Deveau C, Gharib M, Laporte A, Desenclos JC, Costagliola D, 2005. Development and validation of an immunoassay for identification of recent human immunodeficiency virus type 1 infections and its use on dried serum spots. *J Clin Microbiol* 43: 4441–4447.
  51. Ayele W, Schuurman R, Messele T, Dorigo-Zetsma W, Mengistu Y, Goudsmit J, Paxton WA, de Baar MP, Pollakis G, 2007. Use of dried spots of whole blood, plasma, and mother's milk collected on filter paper for measurement of human immunodeficiency virus type 1 burden. *J Clin Microbiol* 45: 891–896.
  52. Cassol S, Gill MJ, Pilon R, Cormier M, Voigt RF, Willoughby B, Forbes J, 1997. Quantification of human immunodeficiency virus type 1 RNA from dried plasma spots collected on filter paper. *J Clin Microbiol* 35: 2795–2801.
  53. Brambilla D, Jennings C, Aldrovandi G, Bremer J, Comeau AM, Cassol SA, Dickover R, Jackson JB, Pitt J, Sullivan JL, Butcher A, Grosso L, Reichelderfer P, Fiscus SA, 2003. Multicenter evaluation of use of dried blood and plasma spot specimens in quantitative assays for human immunodeficiency virus RNA: measurement, precision, and RNA stability. *J Clin Microbiol* 41: 1888–1893.
  54. Rossi de Gasperis M, Caione MD, Concato C, Fiscarelli E, Di Pietro N, Salotti V, Putignani L, Menichella D, Callea F, 2010. Quantitative recovery of proviral HIV-1 DNA from leukocytes by the Dried Buffy Coat Spot method for real-time PCR determination. *J Virol Methods* 170: 121–127.
  55. Fata A, Khamesipour A, Mohajery M, Hosseininejad Z, Afzalaghaei M, Berenji F, Ganjbakhsh M, Akhavan AA, Eskandari E, Amin-Mohammadi A, 2009. Whatman paper (FTA cards) for storing and transferring Leishmania DNA for PCR examination. *Iran J Parasitol* 4: 37–42.
  56. Boggild AK, Valencia BM, Espinosa D, Veland N, Ramos AP, Arevalo J, Llanos-Cuentas A, Low DE, 2010. Detection and species identification of Leishmania DNA from filter paper lesion impressions for patients with American cutaneous leishmaniasis. *Clin Infect Dis* 50: e1–e6.
  57. Kato H, Caceres AG, Mimori T, Ishimaru Y, Sayed AS, Fujita M, Iwata H, Uezato H, Velez LN, Gomez EA, Hashiguchi Y, 2010. Use of FTA cards for direct sampling of patients' lesions in the ecological study of cutaneous leishmaniasis. *J Clin Microbiol* 48: 3661–3665.
  58. Aye KS, Matsuoka M, Kai M, Kyaw K, Win AA, Shwe MM, Thein M, Htoo MM, Htoon MT, 2011. FTA card utility for PCR detection of *Mycobacterium leprae*. *Jpn J Infect Dis* 64: 246–248.
  59. Kakizawa J, Ushijima H, Oka S, Ikeda Y, Schroder HC, Muller WE, 1996. Detection of human immunodeficiency virus-1 DNA, RNA and antibody, and occult blood in inactivated saliva: availability of the filter paper disk method. *Acta Paediatr Jpn* 38: 218–223.
  60. Chibo D, Riddell MA, Catton MG, Birch CJ, 2005. Applicability of oral fluid collected onto filter paper for detection and genetic characterization of measles virus strains. *J Clin Microbiol* 43: 3145–3149.
  61. Guio H, Okayama H, Ashino Y, Saitoh H, Xiao P, Miki M, Yoshihara N, Nakanowatari S, Hattori T, 2006. Method for efficient storage and transportation of sputum specimens for molecular testing of tuberculosis. *Int J Tuberc Lung Dis* 10: 906–910.
  62. Mharakurwa S, Simoloka C, Thuma PE, Shiff CJ, Sullivan DJ, 2006. PCR detection of *Plasmodium falciparum* in human urine and saliva samples. *Malar J* 5: 123.
  63. Zerr DM, Huang ML, Corey L, Erickson M, Parker HL, Frenkel LM, 2000. Sensitive method for detection of human herpesviruses 6 and 7 in saliva collected in field studies. *J Clin Microbiol* 38: 1981–1983.
  64. Nuchprayoon S, Saksirisampant W, Jaijakul S, Nuchprayoon I, 2007. Flinders Technology Associates (FTA) filter paper-based DNA extraction with polymerase chain reaction (PCR) for detection of *Pneumocystis jirovecii* from respiratory specimens of immunocompromised patients. *J Clin Lab Anal* 21: 382–386.
  65. Kailash U, Hedau S, Gopalkrishna V, Katiyar S, Das BC, 2002. A simple 'paper smear' method for dry collection, transport and storage of cervical cytological specimens for rapid screening of HPV infection by PCR. *J Med Microbiol* 51: 606–610.
  66. Gustavsson I, Lindell M, Wilander E, Strand A, Gyllensten U, 2009. Use of FTA card for dry collection, transportation and storage of cervical cell specimen to detect high-risk HPV. *J Clin Virol* 46: 112–116.
  67. Banura C, Franceschi S, van Doorn LJ, Wabwire-Mangen F, Mbidde EK, Weiderpass E, 2008. Detection of cervical human papillomavirus infection in filter paper samples: a comparative study. *J Med Microbiol* 57: 253–255.
  68. Page AL, Alberti KP, Guenole A, Mondongue V, Lonlas Maye S, Guerin PJ, Quilici ML, 2011. Use of filter paper as a transport medium for laboratory diagnosis of cholera under field conditions. *J Clin Microbiol* 49: 3021–3023.
  69. Carnevale S, Velasquez JN, Labbe JH, Chertcoff A, Cabrera MG, Rodriguez MI, 2000. Diagnosis of *Enterocytozoon bieneusi* by PCR in stool samples eluted from filter paper disks. *Clin Diagn Lab Immunol* 7: 504–506.
  70. Zlateva KT, Maes P, Rahman M, Van Ranst M, 2005. Chromatography paper strip sampling of enteric adenoviruses type 40 and 41 positive stool specimens. *Virol J* 2: 6.
  71. Wollants E, Maes P, Thoelen I, Vanneste F, Rahman M, Van Ranst M, 2004. Evaluation of a norovirus sampling method using sodium dodecyl sulfate/EDTA-pretreated chromatography paper strips. *J Virol Methods* 122: 45–48.
  72. Rahman M, Goegebuer T, De Leener K, Maes P, Matthijssens J, Podder G, Azim T, Van Ranst M, 2004. Chromatography paper strip method for collection, transportation, and storage of rotavirus RNA in stool samples. *J Clin Microbiol* 42: 1605–1608.

73. Nozawa N, Koyano S, Yamamoto Y, Inami Y, Kurane I, Inoue N, 2007. Real-time PCR assay using specimens on filter disks as a template for detection of cytomegalovirus in urine. *J Clin Microbiol* 45: 1305–1307.
74. Peltola H, Roine I, Leinonen M, Kuisma L, Mata AG, Arbo A, Goyo J, Saukkoripi A, 2010. Diagnosis of *Streptococcus pneumoniae* and *Haemophilus influenzae* type b meningitis by identifying DNA from cerebrospinal fluid-impregnated filter paper strips. *Pediatr Infect Dis J* 29: 111–114.
75. Fleury A, Bouteille B, Garcia E, Marquez C, Preux PM, Escobedo F, Sotelo J, Dumas M, 2001. Neurocysticercosis: validity of ELISA after storage of whole blood and cerebrospinal fluid on paper. *Trop Med Int Health* 6: 688–693.
76. Comeau AM, 1994. Application of the polymerase chain reaction for the detection of HIV in specimens from newborn screening programs. *Acta Paediatr* 400: 29–30.
77. De Crignis E, Re MC, Cimatti L, Zecchi L, Gibellini D, 2010. HIV-1 and HCV detection in dried blood spots by SYBR Green multiplex real-time RT-PCR. *J Virol Methods* 165: 51–56.
78. Luo W, Yang H, Rathbun K, Pau CP, Ou CY, 2005. Detection of human immunodeficiency virus type 1 DNA in dried blood spots by a duplex real-time PCR assay. *J Clin Microbiol* 43: 1851–1857.
79. Mehta N, Trzmielina S, Nonyane BAS, Eliot MN, Lin R, Foulkes AS, McNeal K, Ammann A, Eulalievyolo V, Sullivan JL, Luzuriaga K, Somasundaran M, 2009. Low-cost HIV-1 diagnosis and quantification in dried blood spots by real time PCR. *PLoS One* 4: e5819.
80. Ou CY, Yang H, Balinandi S, Sawadogo S, Shanmugam V, Tih PM, Adje-Toure C, Tancho S, Ya LK, Bulterys M, Downing R, Nkengasong JN, 2007. Identification of HIV-1 infected infants and young children using real-time RT PCR and dried blood spots from Uganda and Cameroon. *J Virol Methods* 144: 109–114.
81. Panteleeff DD, John G, Nduati R, Mbori-Ngacha D, Richardson B, Kreiss J, Overbaugh J, 1999. Rapid method for screening dried blood samples on filter paper for human immunodeficiency virus type 1 DNA. *J Clin Microbiol* 37: 350–353.
82. Nyambi PN, Fransen K, De Beenhouwer H, Chomba EN, Temmerman M, Ndinya-Achola JO, Piot P, van der Groen G, Ndinya-Achola JO, 1994. Detection of human immunodeficiency virus type 1 (HIV-1) in heel prick blood on filter paper from children born to HIV-1 seropositive mothers. *J Clin Microbiol* 32: 2858–2860.
83. Jacob S, Anitha D, Vishwanath R, Parameshwari S, Samuel N, 2008. The use of dried blood spots on filter paper for the diagnosis of HIV-1 in infants born to HIV seropositive women. *Indian J Med Microbiol* 26: 71–74.
84. Chohan BH, Emery S, Wamalwa D, John-Stewart G, Majiwa M, Ng'ayo M, Froggett S, Overbaugh J, 2011. Evaluation of a single round polymerase chain reaction assay using dried blood spots for diagnosis of HIV-1 infection in infants in an African setting. *BMC Pediatr* 11: 18.
85. Walter J, Kuhn L, Semrau K, Decker DW, Sinkala M, Kankasa C, Thea DM, Bulterys M, Ou CY, Aldrovandi GM, 2009. Detection of low levels of human immunodeficiency virus (HIV) may be critical for early diagnosis of pediatric HIV infection by use of dried blood spots. *J Clin Microbiol* 47: 2989–2991.
86. Zhang Q, Wang LH, Jiang Y, Fang LW, Pan PL, Gong SY, Yao J, Tang YW, Vermund SH, Jia YJ, 2008. Early infant human immunodeficiency virus type 1 detection suitable for resource-limited settings with multiple circulating subtypes by use of nested three-monoplex DNA PCR and dried blood spots. *J Clin Microbiol* 46: 721–726.
87. Yourno J, 1993. Direct polymerase chain reaction for detection of human immunodeficiency virus in blood spot residues on filter paper after elution of antibodies: an adjunct to serological surveys for estimating vertical transmission rates among human immunodeficiency virus antibody-positive newborns. *J Clin Microbiol* 31: 1364–1367.
88. Yourno J, Conroy J, 1992. A novel polymerase chain reaction method for detection of human immunodeficiency virus in dried blood spots on filter paper. *J Clin Microbiol* 30: 2887–2892.
89. Beck IA, Drennan KD, Melvin AJ, Mohan KM, Herz AM, Alarcon J, Piscocya J, Velazquez C, Frenkel LM, 2001. Simple, sensitive, and specific detection of human immunodeficiency virus type 1 subtype B DNA in dried blood samples for diagnosis in infants in the field. *J Clin Microbiol* 39: 29–33.
90. Bellisario R, Colinas RJ, Pass KA, 2001. Simultaneous measurement of antibodies to three HIV-1 antigens in newborn dried blood-spot specimens using a multiplexed microspheres-based immunoassay. *Early Hum Dev* 64: 21–25.
91. Cassol SA, Lapointe N, Salas T, Hankins C, Arella M, Fauvel M, Delage G, Boucher M, Samson J, Charest J, Montpetit ML, O'Shaughnessy MV, 1992. Diagnosis of vertical HIV-1 transmission using the polymerase chain reaction and dried blood spot specimens. *J Acquir Immune Defic Syndr* 5: 113–119.
92. Cassol S, Salas T, Arella M, Neumann P, Schechter MT, O'Shaughnessy M, 1991. Use of dried blood spot specimens in the detection of human immunodeficiency virus type 1 by the polymerase chain reaction. *J Clin Microbiol* 29: 667–671.
93. Lindhardt BO, Bygbjerg IC, Ulrich K, Petersen HD, Lausen I, Frederiksen B, 1987. Detection of antibodies to human immunodeficiency virus (HIV) in eluates from whole blood impregnated filter paper discs. *J Virol Methods* 18: 73–77.
94. Newell ML, Loveday C, Dunn D, Kaye S, Tedder R, Peckham C, De Maria A, Giaquinto C, Omenaca F, Canosa C, Mür A, et al., 1995. Use of polymerase chain reaction and quantitative antibody tests in children born to human immunodeficiency virus-1-infected mothers. *J Med Virol* 47: 330–335.
95. Sriwanthana B, Wetprasit N, Chareonsook S, Janejai N, Chareonsiriwatana W, 2003. A study to implement early diagnosis of HIV infection in infants born to infected mothers. *Southeast Asian J Trop Med Public Health* 3: 221–226.
96. Parker SP, Cubitt WD, Ades AE, 1997. A method for the detection and confirmation of antibodies to hepatitis C virus in dried blood spots. *J Virol Methods* 68: 199–205.
97. Gupta BP, Jayasuryan N, Jameel S, 1992. Direct detection of hepatitis B virus from dried blood spots by polymerase chain reaction amplification. *J Clin Microbiol* 30: 1913–1916.
98. Lira R, Maldonado-Rodriguez A, Rojas-Montes O, Ruiz-Tachiquin M, Torres-Ibarra R, Cano-Dominguez C, Valdez-Salazar H, Gomez-Delgado A, Munoz O, Alvarez-Munoz MT, 2009. Use of dried blood samples for monitoring hepatitis B virus infection. *Virol J* 6: 153.
99. Soetens O, Vauloup-Fellous C, Foulon I, Dubreuil P, De Saeger B, Grangeot-Keros L, Naessens A, 2008. Evaluation of different cytomegalovirus (CMV) DNA PCR protocols for analysis of dried blood spots from consecutive cases of neonates with congenital CMV infections. *J Clin Microbiol* 46: 943–946.
100. Scanga L, Chaing S, Powell C, Aylsworth AS, Harrell LJ, Henshaw NG, Civalier CJ, Thorne LB, Weck K, Booker J, Gulley ML, 2006. Diagnosis of human congenital cytomegalovirus infection by amplification of viral DNA from dried blood spots on perinatal cards. *J Mol Diagn* 8: 240–245.
101. Vauloup-Fellous C, Ducroux A, Couloigner V, Marlin S, Picone O, Galimand J, Loundon N, Denoyelle F, Grangeot-Keros L, Leruez-Ville M, 2007. Evaluation of cytomegalovirus (CMV) DNA quantification in dried blood spots: retrospective study of CMV congenital infection. *J Clin Microbiol* 45: 3804–3806.
102. Yamamoto AY, Mussi-Pinhata MM, Pinto PCG, Figueiredo LTM, Jorge SM, 2001. Usefulness of blood and urine samples collected on filter paper in detecting cytomegalovirus by the polymerase chain reaction technique. *J Virol Methods* 97: 159–164.
103. Atkinson C, Walter S, Sharland M, Tookey P, Luck S, Peckham C, Griffiths P, 2009. Use of stored dried blood spots for retrospective diagnosis of congenital CMV. *J Med Virol* 81: 1394–1398.
104. Barbi M, Binda S, Primache V, Caroppo S, Dido P, Guidotti P, Corbetta C, Melotti D, 2000. Cytomegalovirus DNA detection in Guthrie cards: a powerful tool for diagnosing congenital infection. *J Clin Virol* 17: 159–165.

105. Barbi M, Binda S, Primache V, Luraschi C, Corbetta C, 1996. Diagnosis of congenital cytomegalovirus infection by detection of viral DNA in dried blood spots. *Clin Diagn Virol* 6: 27–32.
106. Boppana SB, Ross SA, Novak Z, Shimamura M, Tolan RW Jr, Palmer AL, Ahmed A, Michaels MG, Sanchez PJ, Bernstein DI, Britt WJ, Fowler KB, 2010. Dried blood spot real-time polymerase chain reaction assays to screen newborns for congenital cytomegalovirus infection. *JAMA* 303: 1375–1382.
107. Condorelli F, Scalia G, Stivala A, Gallo R, Marino A, Battaglini CM, Castro A, 1994. Detection of immunoglobulin G to measles virus, rubella virus, and mumps virus in serum samples and in microquantities of whole blood dried on filter paper. *J Virol Methods* 49: 25–36.
108. De Swart RL, Nur Y, Abdallah A, Kruining H, Sittana El Mubarak H, Ibrahim SA, Van Den Hoogen B, Groen J, Osterhaus ADME, 2001. Combination of reverse transcriptase PCR analysis and immunoglobulin M detection on filter paper blood samples allows diagnostic and epidemiological studies of measles. *J Clin Microbiol* 39: 270–273.
109. El Mubarak HS, Yuksel S, Mustafa OM, Ibrahim SA, Osterhaus AD, de Swart RL, 2004. Surveillance of measles in the Sudan using filter paper blood samples. *J Med Virol* 73: 624–630.
110. Punnarugsa V, Mungmee V, 1991. Detection of rubella virus immunoglobulin G (IgG) and IgM antibodies in whole blood on Whatman paper: comparison with detection in sera. *J Clin Microbiol* 29: 2209–2212.
